# Supplementary material for: Unraveling the physical and physiological basis for the solar- induced chlorophyll fluorescence and photosynthesis relationship using continuous leaf and canopy measurements of a corn crop
Source: Copernicus journal article supplement (doi:10.5194/bg-18-441-2021), 2021-01-20
Supplement: Supplementary file 1 [file bg-18-441-2021-supplement.zip]

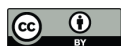

## *Supplement of*

# **Unraveling the physical and physiological basis for the solar-induced chlorophyll fluorescence and photosynthesis relationship using continuous leaf and canopy measurements of a corn crop**

**Peiqi Yang et al.**

*Correspondence to:* Peiqi Yang (p.yang@utwente.nl)

- [bg-18-441-2021-supplement-title-page.pdf](#)
- [Data\\_Used\\_in\\_paper.xlsx](#)

The copyright of individual parts of the supplement might differ from the CC BY 4.0 License.
